# Supplementary material for: USP13 negatively regulates antiviral responses by deubiquitinating STING
Source: PubMed Central journal article supplement (PMC5457515; doi:10.1038/ncomms15534), 2017-05-23

**a**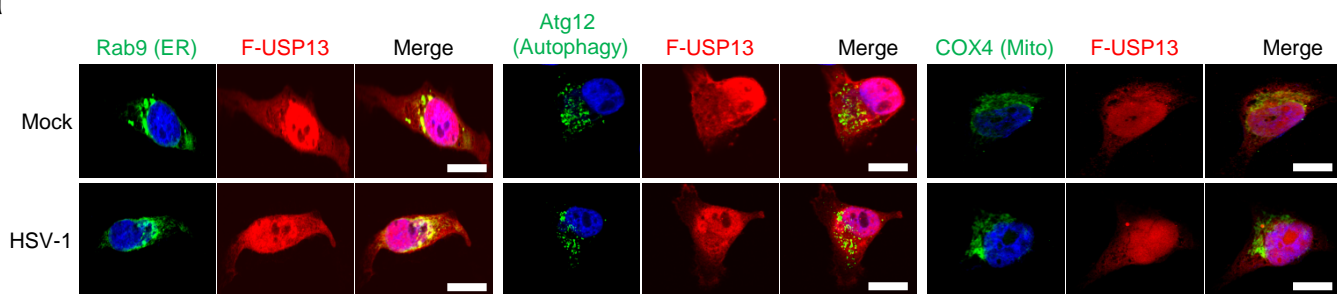**b**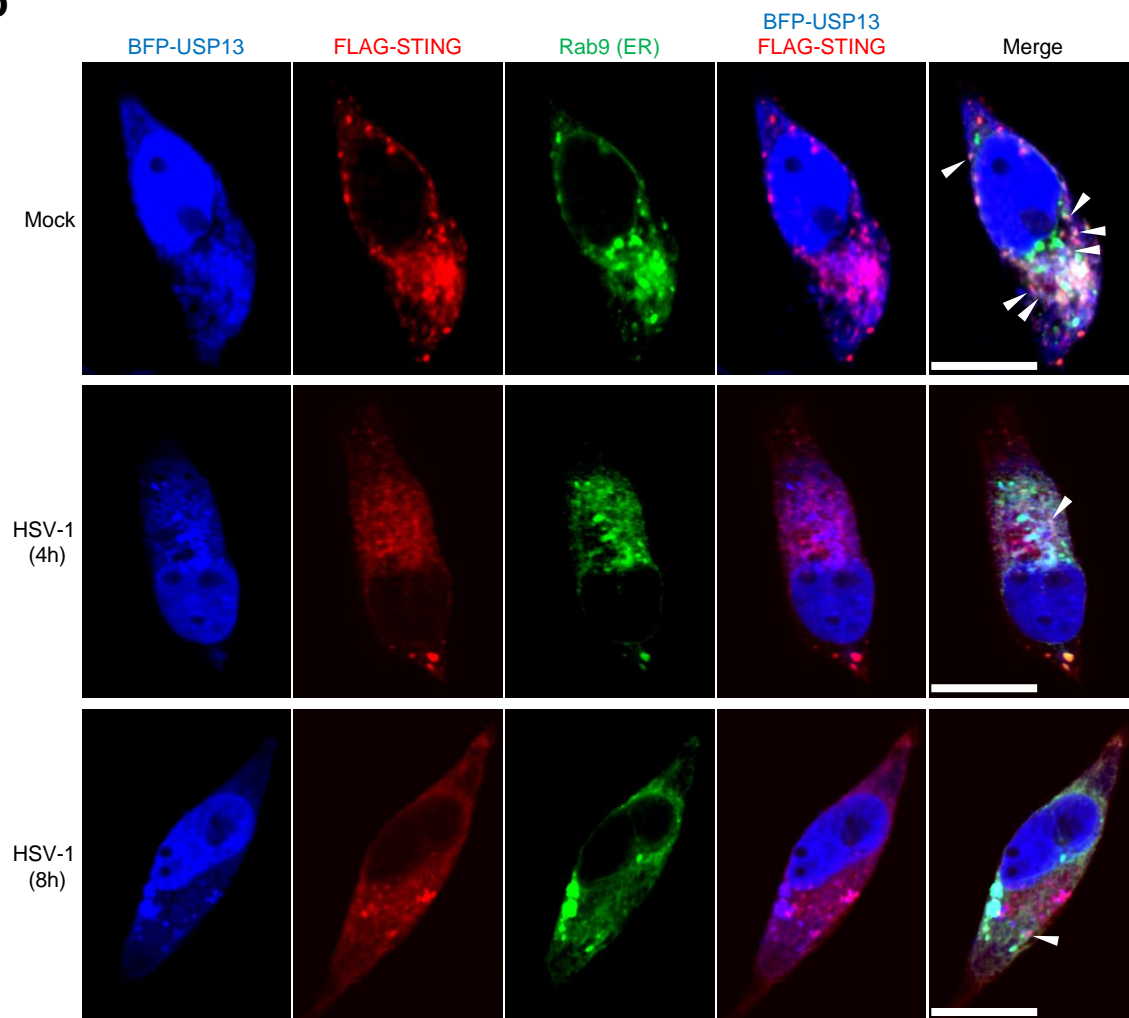**Supplementary Figure 1 USP13 and STING colocalize at ER.**

(a) Immunofluorescence staining (with anti-Atg12, anti-COX4 or anti-FLAG) and confocal microscopy analysis of HeLa cells transfected with Rab9 (an ER marker) and FLAG-USP13 for 20 hours followed by mock infection or HSV-1 infection for 8 hours.

(b) Immunofluorescence and confocal microscopy analysis of HeLa cells transfected with Rab9, BFP-USP13 and FLAG-STING for 20 hours followed by HSV-1 infection for 0-8 hours. Arrow heads indicate colocalization of STING and USP13 at ER.

Scale bars represent 20  $\mu$ m. Data are representative of three independent experiments.

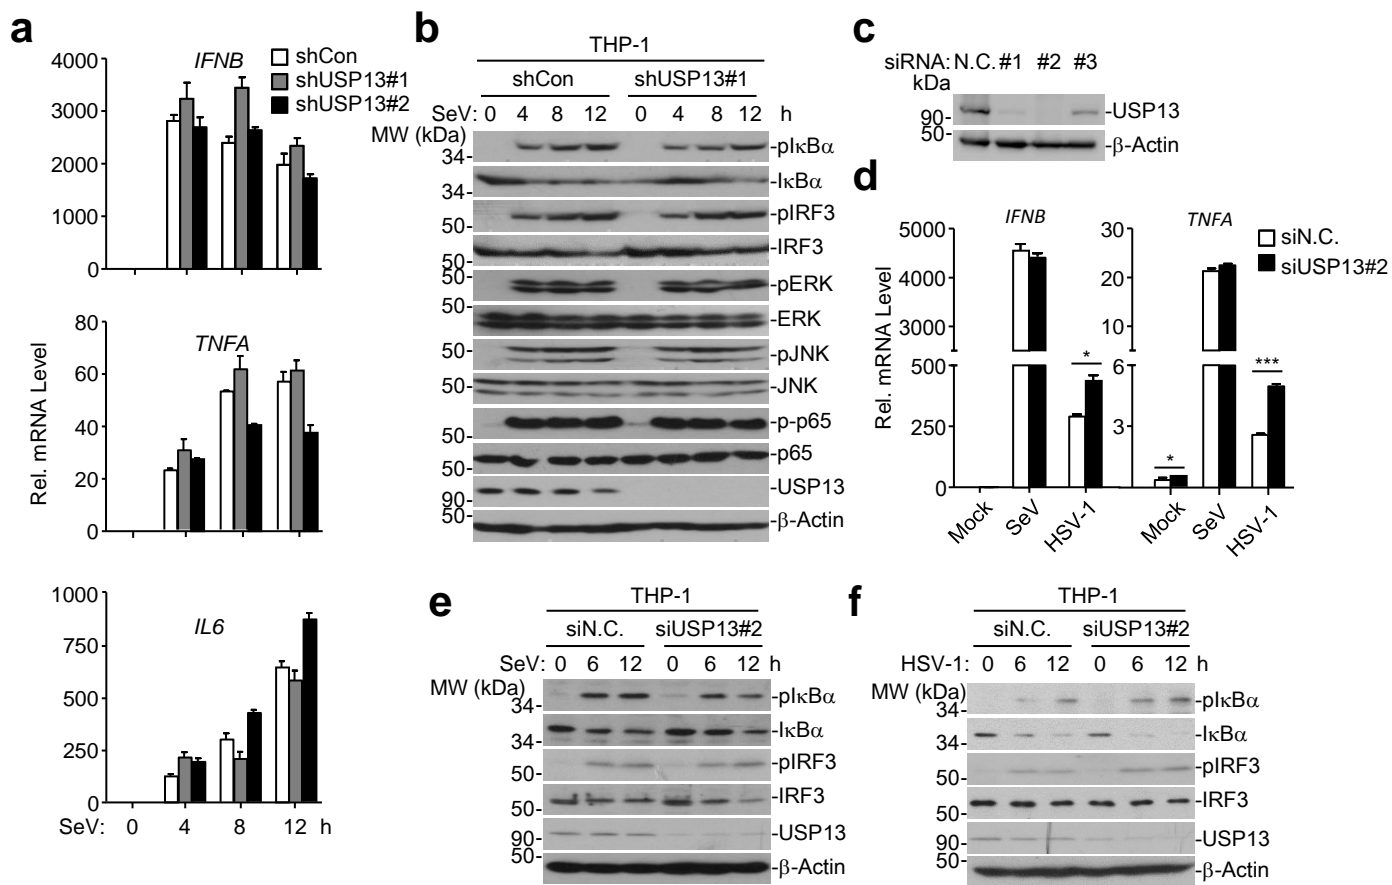

**Supplementary Figure 2 Knockdown of USP13 did not affect SeV-triggered signaling.**

(a) qRT-PCR analysis of *IFNB*, *TNFA*, and *IL6* in THP-1 cells stably transfected with control shRNA, shUSP13#1 or shUSP13#2, then infected with HSV-1 for 0-24 hours.  
 (b) Immunoblot analysis of phosphorylated and total IRF3, IκBα, ERK, p38, and JNK and β-Actin in THP-1 cells stably transfected with control shRNA or shUSP13#1, then infected with HSV-1 for 0-12 hours.

(c) Immunoblot analysis (with anti-USP13 or anti-β-Actin) of THP-1 cells transfected siRNAs targeting USP13 (#1, #2, #3) or non-targeting control siRNA(N.C.) for 36 hours.

(d) qRT-PCR analysis of *IFNB* and *TNFA* in THP-1 cells transfected with siUSP13#2 or N.C. for 36 hours, then infected with HSV-1 or SeV for 0-8 hours.

(e-f) Immunoblot analysis of phosphorylation of IRF3 and IκBα, total IRF3 and IκBα, USP13 and β-Actin in THP-1 cells transfected with siUSP13#2 or N.C. for 36 hours, then infected with SeV (e) or HSV-1 (f) for 0-8 hours.

\* $P < 0.05$ ; \*\*\* $P < 0.001$  (analysis of two-way ANOVA followed by Bonferroni post-test). Data are representative of three independent experiments (mean  $\pm$  S.D. in a and d).

**a**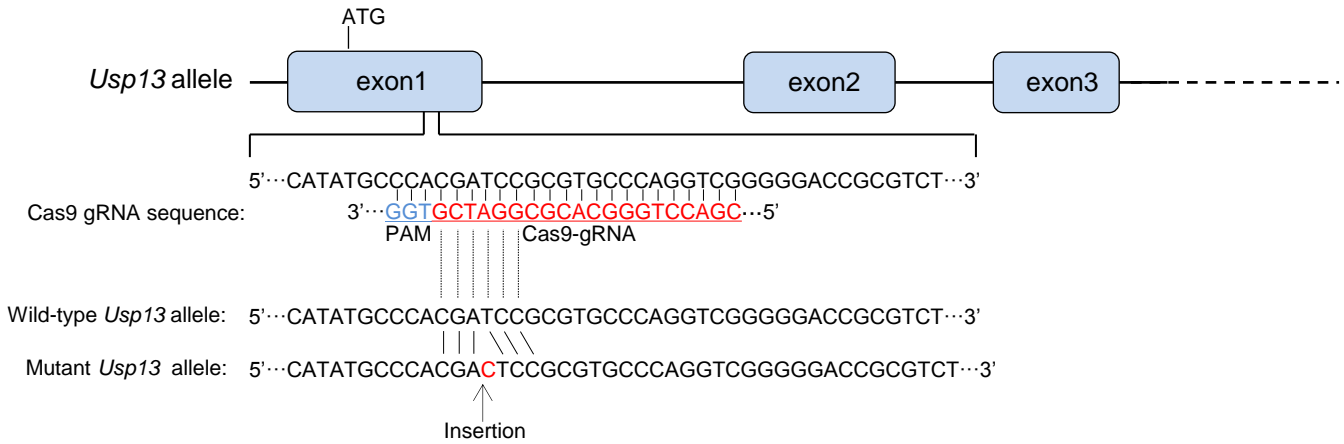**b**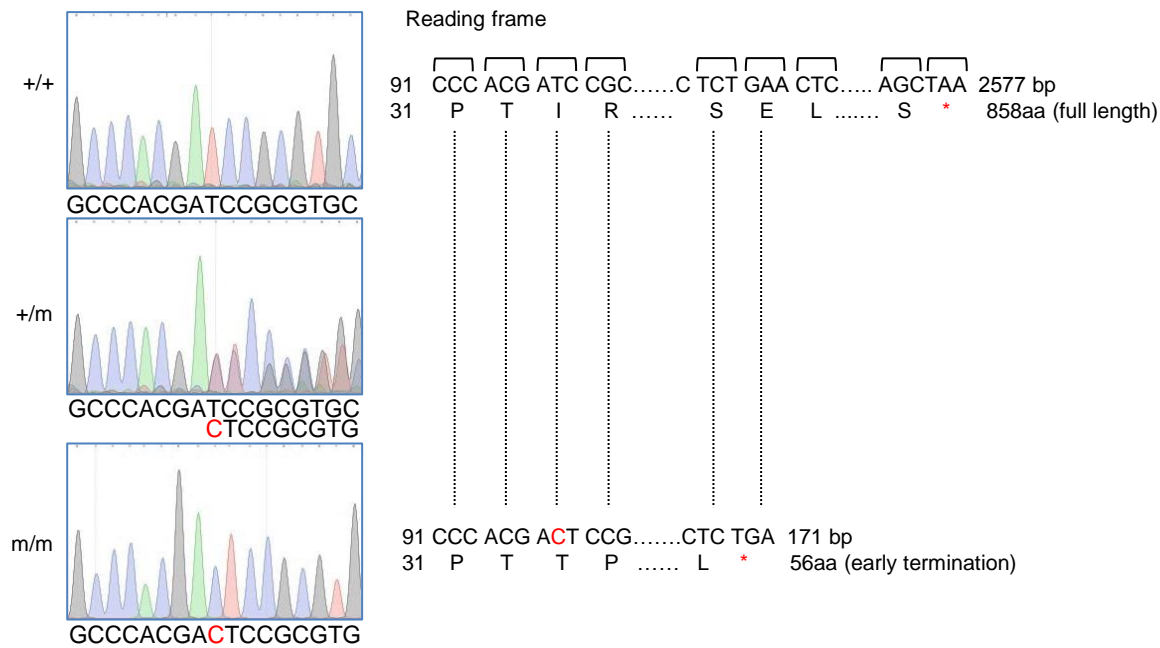**c**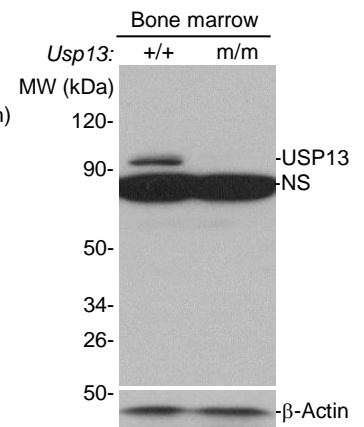**Supplementary Figure 3 Generation of *Usp13*<sup>m/m</sup> mice.****(a)** A scheme for CRISPR/Cas9-mediated genome editing of the *Usp13* gene locus.**(b)** Gene sequence and reading frame of *Usp13*<sup>+/+</sup>, *Usp13*<sup>+/m</sup> and *Usp13*<sup>m/m</sup> mice.**(c)** Immunoblot analysis of USP13 in bone marrow cells from *Usp13*<sup>+/+</sup> and *Usp13*<sup>m/m</sup> mice.

Data are representative of two (c) independent experiments.

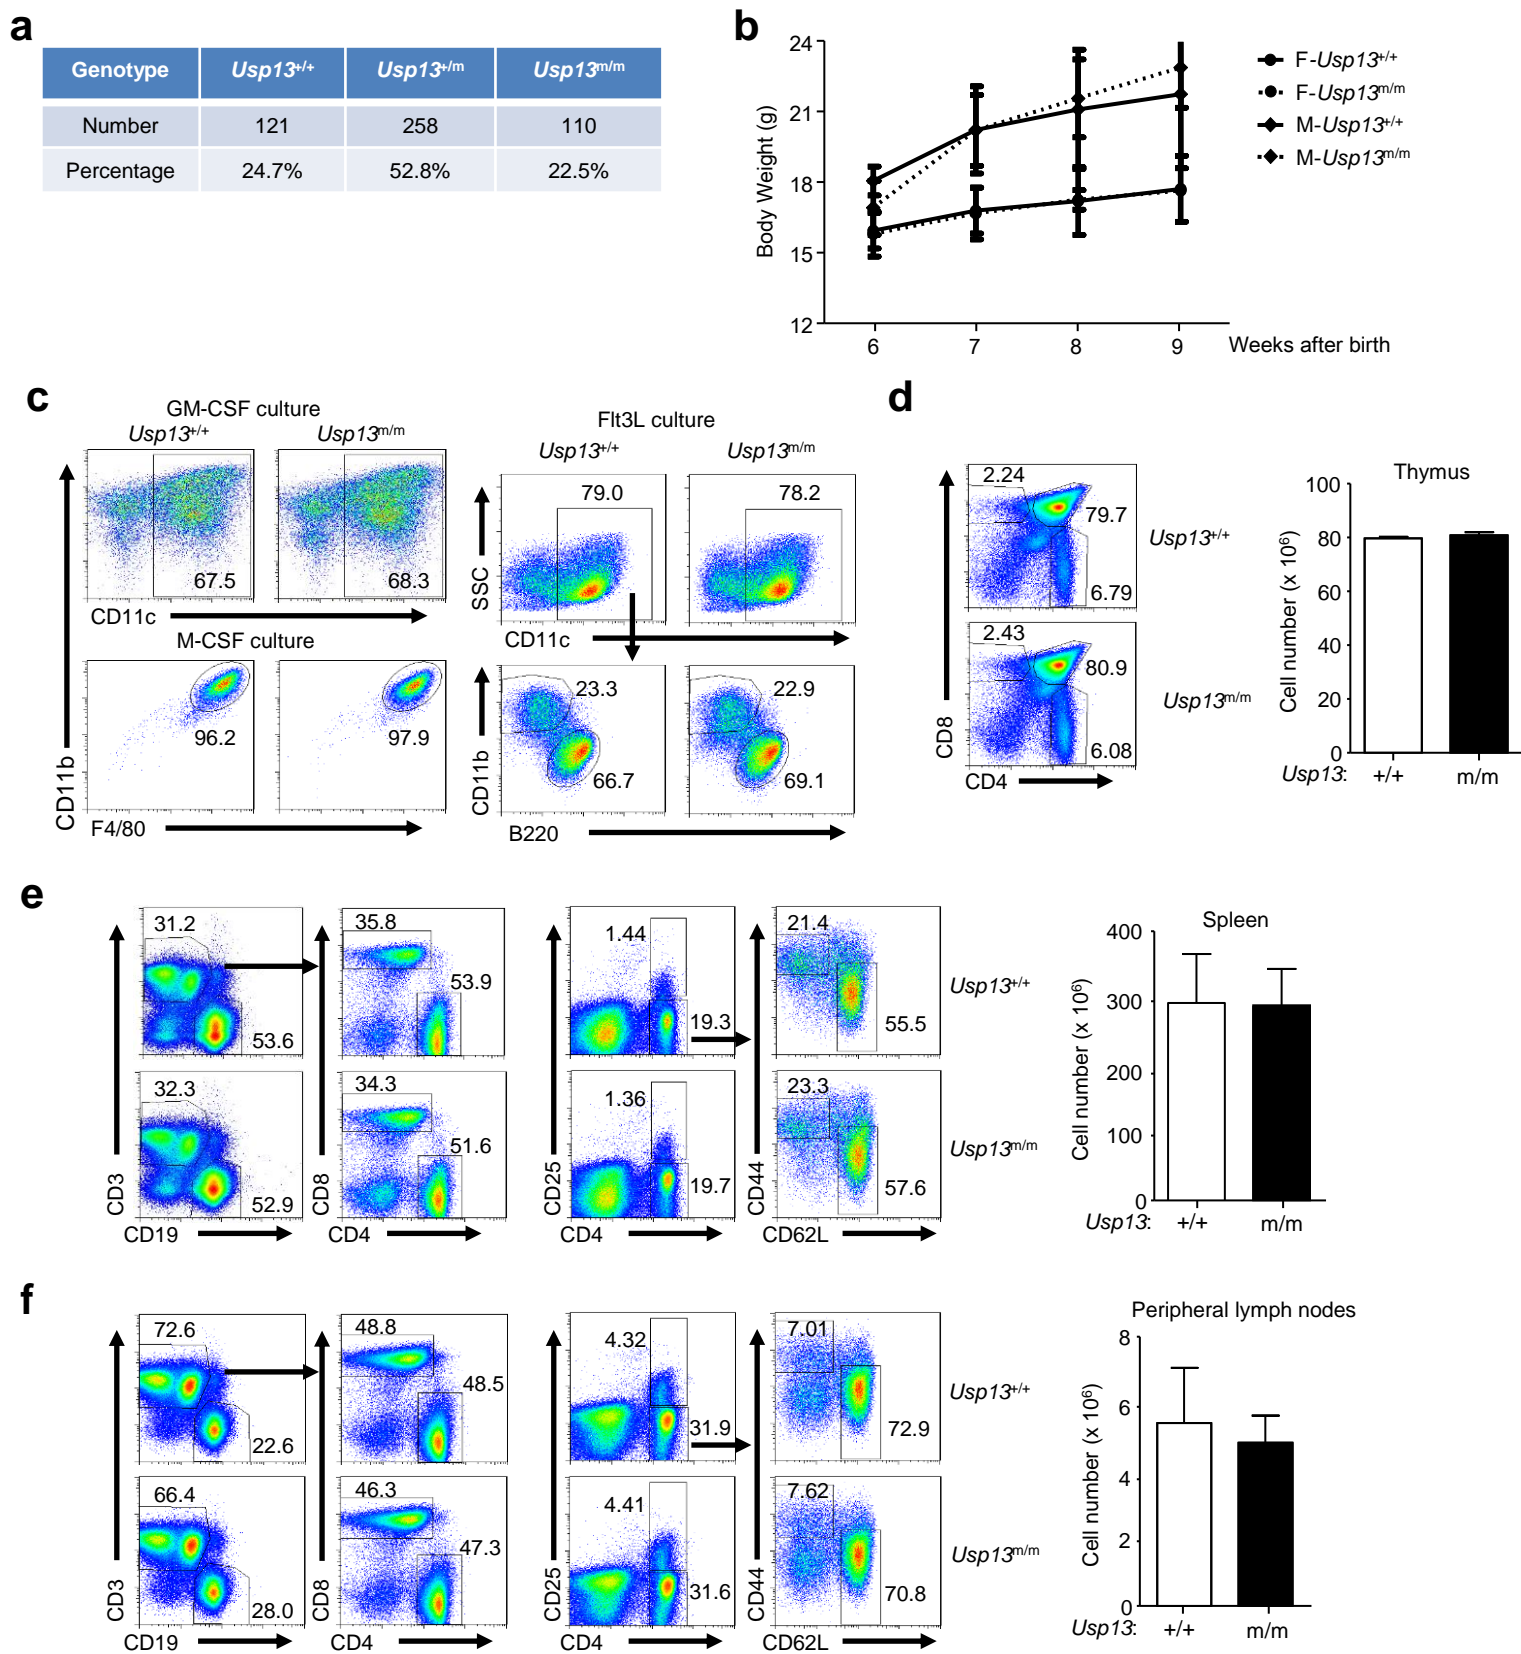

**Supplementary Figure 4 USP13 deficiency did not alter the homeostasis of immune cells.**

(a) Mice numbers and percentages of each genotype.

(b) Mice body weight of each genotype. F, Female; M, Male.

(c) Flow cytometry analysis of GM-CSF, M-CSF or Flt3L induced DCs, Macrophage cells or pDCs from *Usp13*<sup>+/+</sup> and *Usp13*<sup>m/m</sup> mice.

(d-f) Flow cytometry analysis of immune cells and quantitative data in thymus (e), spleen (f) and peripheral lymph nodes from *Usp13*<sup>+/+</sup> and *Usp13*<sup>m/m</sup> mice.

Data are representative of two (c-f) independent experiments (n=3) (mean ± S.D. in b, d-f).

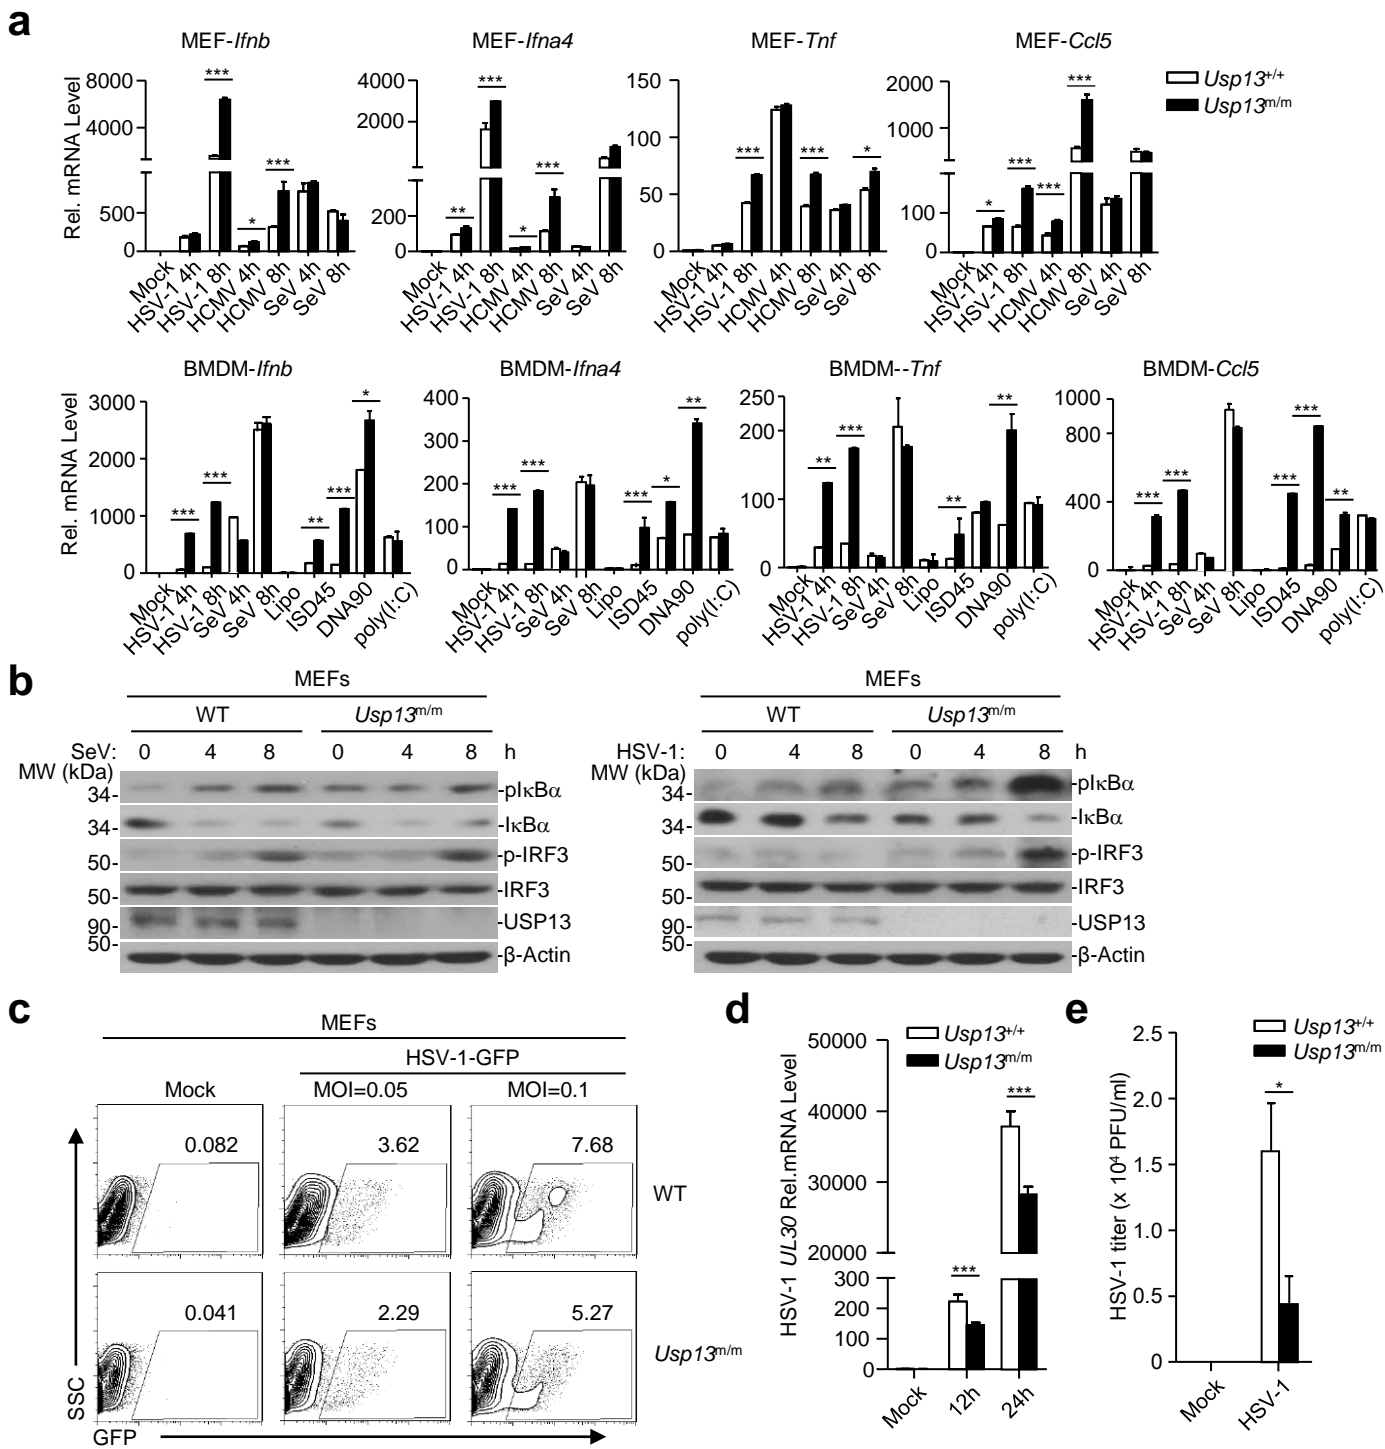

**Supplementary Figure 5 USP13 deficiency potentiated HSV-1- but not SEV-triggered signaling in MEFs or BMDMs.**

(a) qRT-PCR analysis of *Ifnb*, *Ifna4*, *Tnf* or *Ccl5* mRNA in *Usp13*<sup>+/+</sup> and *Usp13*<sup>m/m</sup> MEFs or BMDMs left uninfected (Mock) or infected with HSV-1, SeV, HCMV or EMCV for 0-8 hours, or mock transfected (Lipo) or transfected with ISD45, DNA90 or poly(I:C) for 6 hours.

(b) Immunoblot analysis of phosphorylation of IRF3 and IκBα, total IRF3 and IκBα, USP13 and β-Actin in *Usp13*<sup>+/+</sup> and *Usp13*<sup>m/m</sup> MEFs infected with SeV or HSV-1 for 0-8 hours.

(c) Flow cytometry analysis of *Usp13*<sup>+/+</sup> and *Usp13*<sup>m/m</sup> MEFs infected with HSV-1-GFP for 24 hours. Numbers adjacent to outlined areas indicate the percentages of GFP<sup>+</sup> MEFs.

(d) qRT-PCR analysis of HSV-1-*UL30* mRNA in *Usp13*<sup>+/+</sup> and *Usp13*<sup>m/m</sup> MEFs infected with HSV-1 for 1 hour followed by twice PBS wash and subsequent incubation in full medium for 0-24 hours.

(e) Viral plaque assay of HSV-1 in *Usp13*<sup>+/+</sup> and *Usp13*<sup>m/m</sup> MEFs infected with HSV-1 for 1 hour followed by twice PBS wash and cultured in full medium for 32 hours.

\**P* < 0.05; \*\**P* < 0.01; \*\*\**P* < 0.001 (analysis of two-way ANOVA followed by Bonferroni post-test). Data are representative of three (a, b) or two (c-e) independent experiments (mean ± S.D. in a, d-e).

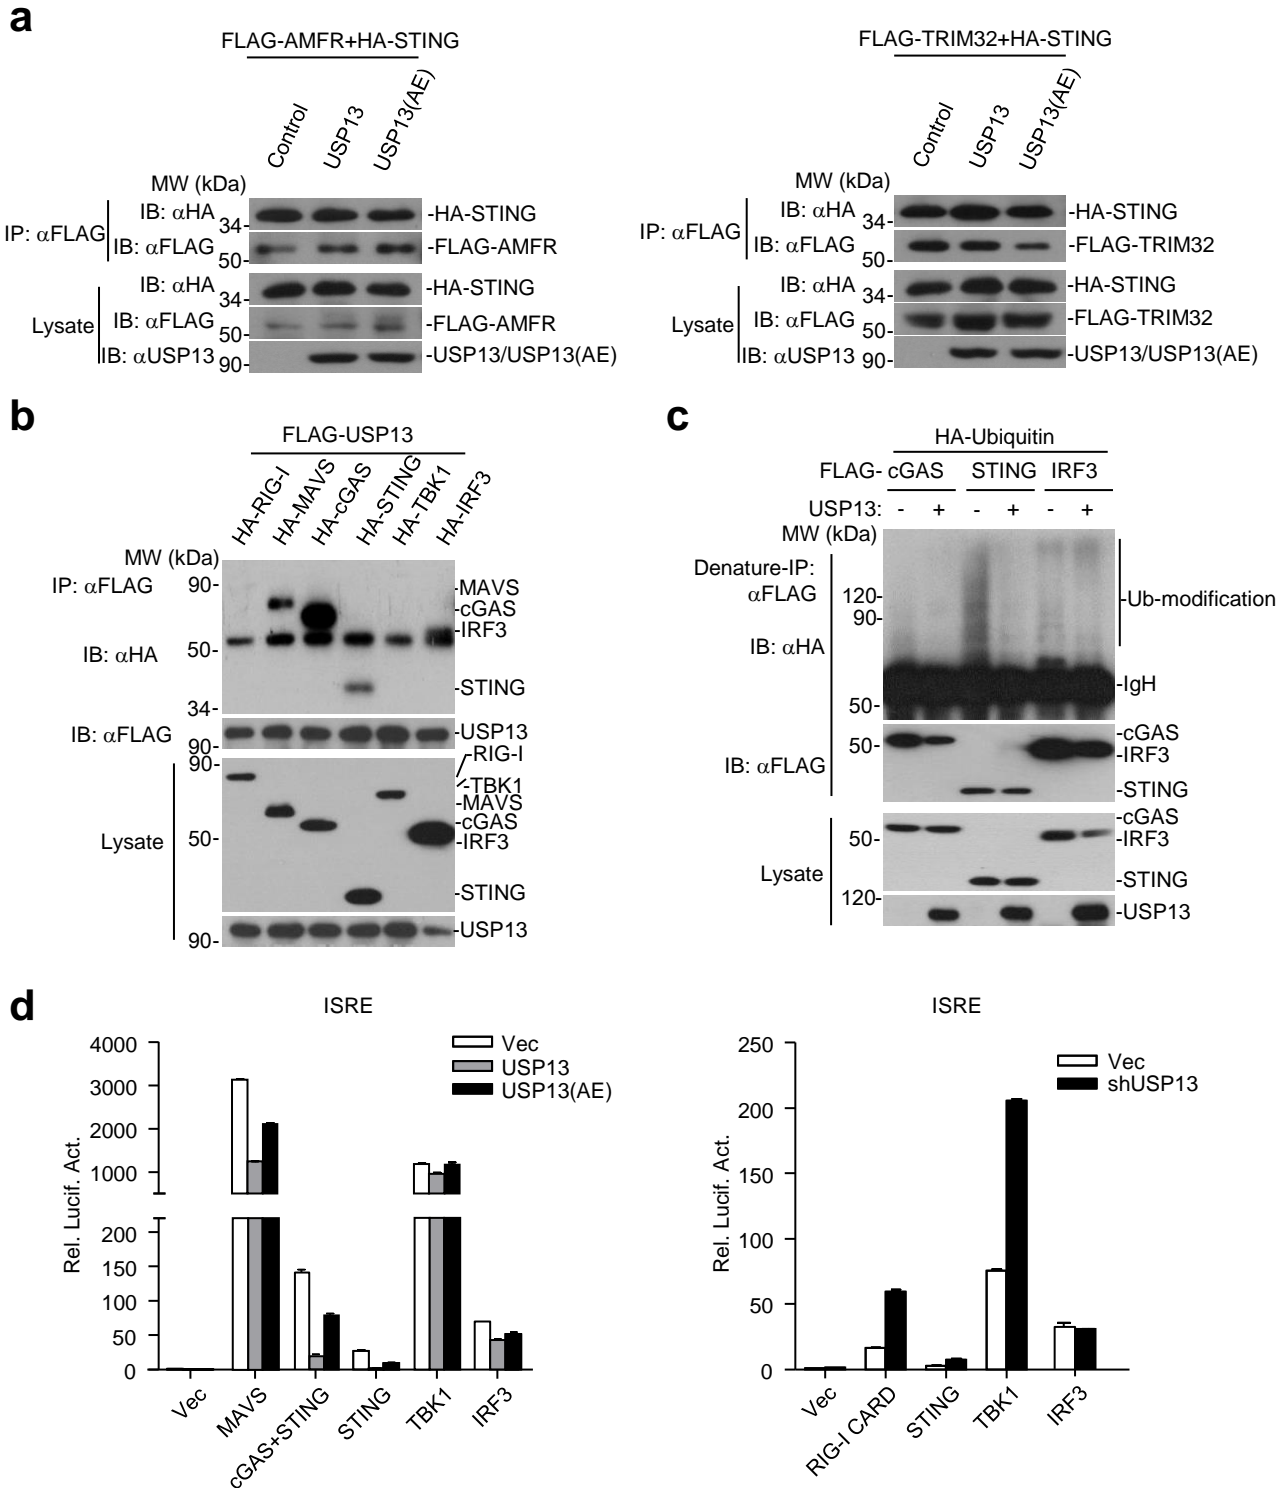

**Supplementary Figure 6 USP13 functions at the level of STING.**

(a) Immunoprecipitation (with anti-FLAG) and immunoblot analysis (with anti-FLAG, anti-HA or anti-USP13) of HEK293 cells transfected with plasmids encoding FLAG-tagged AMFR or TRIM32, HA-STING and USP13 or USP13 enzymatic inactive mutation for 24 hours.

(b) Immunoprecipitation (with anti-FLAG) and immunoblot analysis (with anti-FLAG or anti-HA) of HEK293 cells transfected with plasmids encoding FLAG-USP13 and HA-tagged RIG-I, MAVS, cGAS, STING, TBK1 or IRF3 for 24 hours.

(c) Denature-immunoprecipitation (with anti-FLAG) and immunoblot analysis (with anti-FLAG, anti-HA or anti-USP13) of HEK293 cells transfected with plasmids encoding HA-ubiquitin, FLAG-tagged cGAS, STING or IRF3, and either empty vector or USP13 for 24 hours.

(d) Luciferase assay analyzing ISRE promoter activity in HEK293 cells transfected with plasmids encoding MAVS, cGAS, STING, TBK1 or IRF3, an ISRE firefly luciferase reporter (ISRE-Luc) and the empty vector, USP13 or USP13(AE) for 24 hours (left graph). Luciferase assay analyzing ISRE promoter activity in HEK293 cells transfected with plasmids encoding RIG-I CARD, STING, TBK1 or IRF3, an ISRE firefly luciferase reporter (ISRE-Luc) and either the empty vector or shRNA targeting USP13 for 24 hours (right).

Data are representative of two independent experiments (mean  $\pm$  S.D. in **d**).

**a**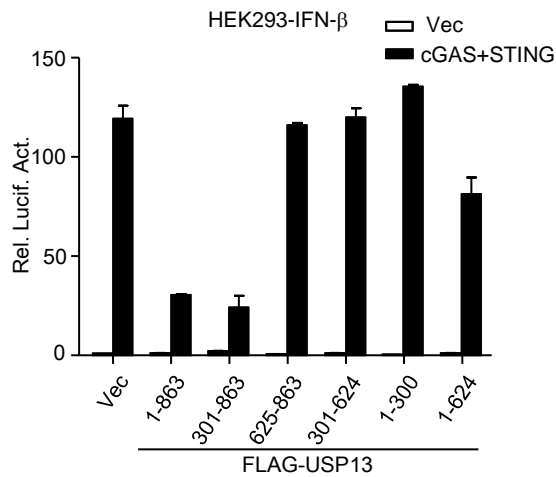**b**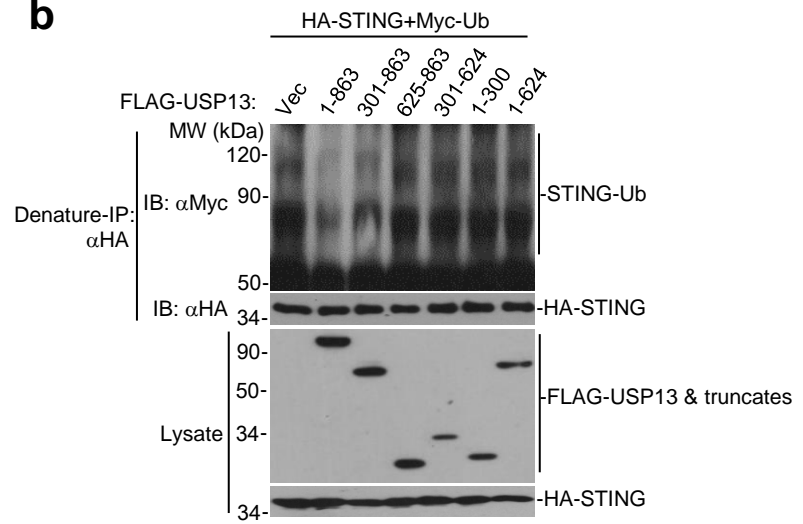**c**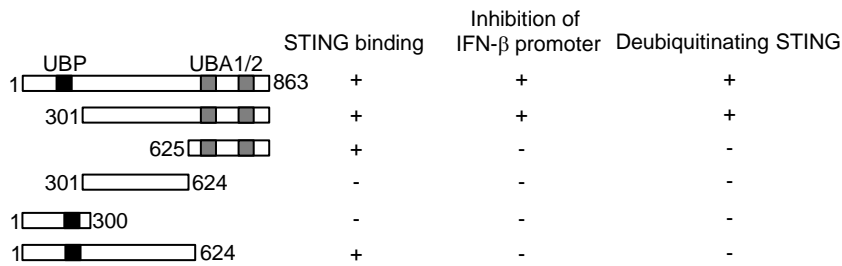

**Supplementary Figure 7 The isopeptidase and the UBA domains of USP13 deubiquitinate STING.**

(a) Reporter assays of HEK293 cells transfected with the indicated truncates of USP13 together with the IFN- $\beta$  luciferase reporter for 24 hours.

(b) Denature-IP (with anti-HA) and immunoblot analysis (with anti-FLAG or anti-Myc) of HEK293 cells transfected with plasmids encoding Myc-Ubiquitin, HA-STING, and FLAG-tagged USP13 or USP13 truncates for 20 hours.

(c) Schematic structures showing USP13 truncates interacting with STING, inhibiting cGAS and STING-mediated activation of IFN- $\beta$  promoter and deubiquitinating STING. Data are representative of two independent experiments (mean  $\pm$  S.D. in a).

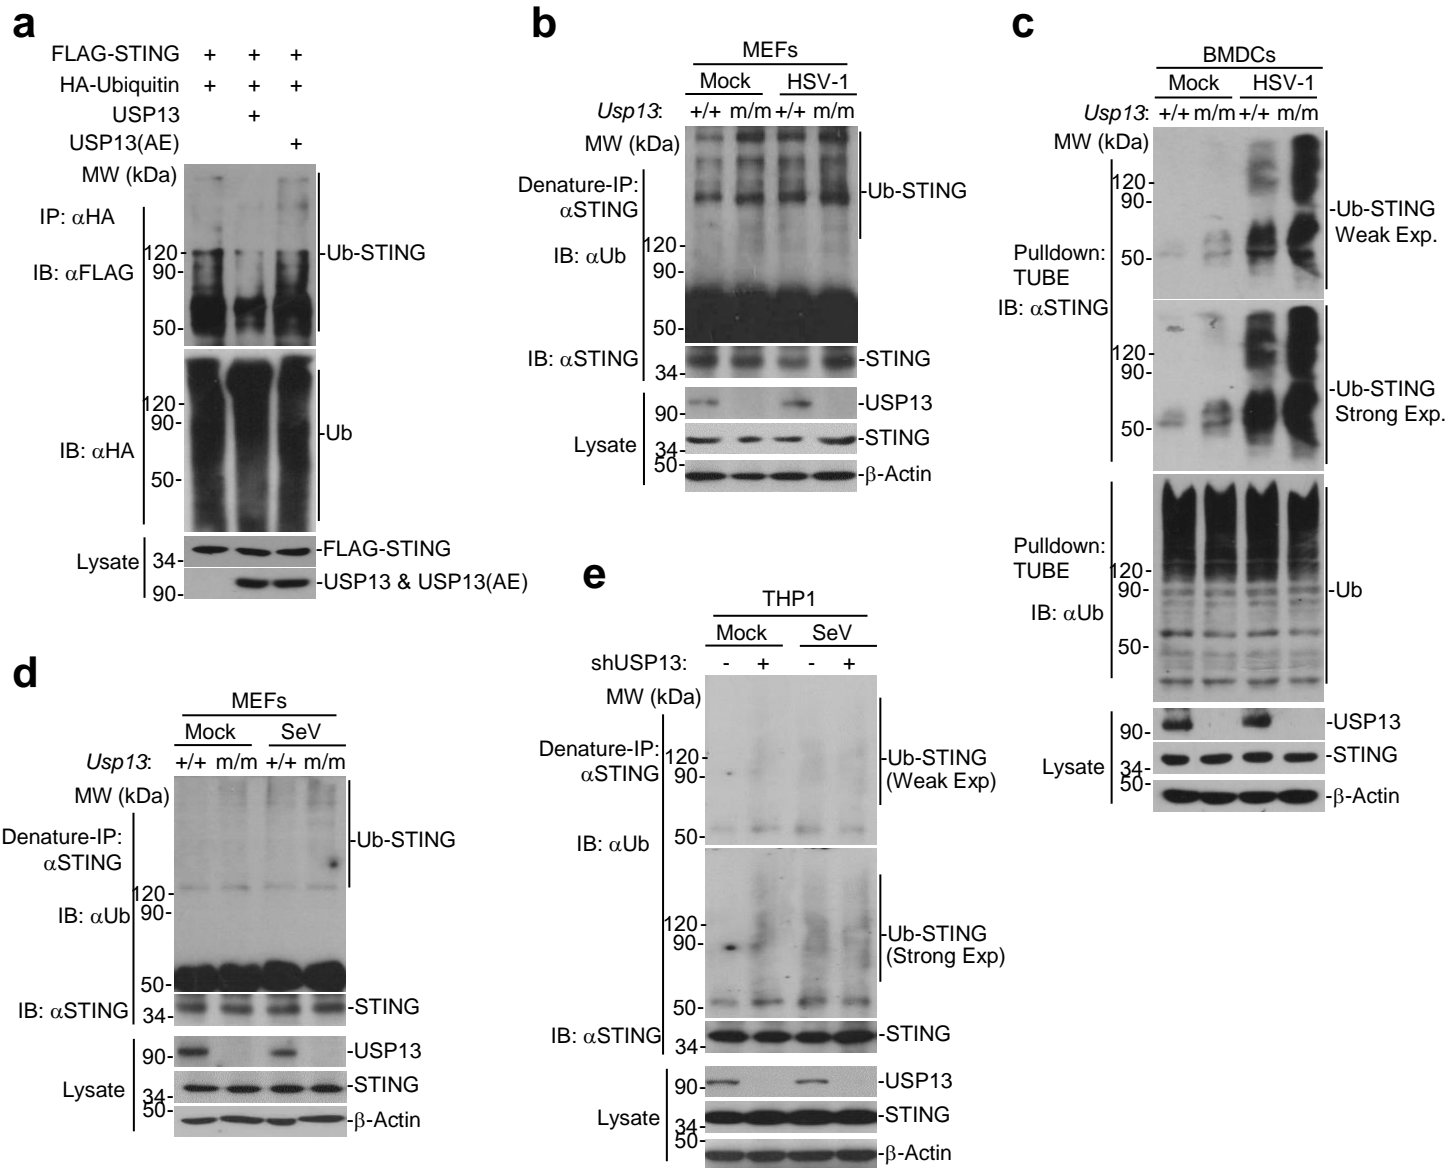

**Supplementary Figure 8 USP13 did not regulate SeV-induced ubiquitination of STING.**

(a) Immunoprecipitation (with anti-HA) and immunoblot analysis (with anti-FLAG, anti-HA, or anti-USP13) of HEK293 cells transfected with plasmids encoding FLAG-STING, HA-Ubiquitin and USP13 or USP13(AE) for 24 hours.

(b) Denature-immunoprecipitation (with anti-STING) and immunoblot analysis (with anti-Ub, anti-STING, anti-USP13 or anti- $\beta$ -Actin) of *Usp13*<sup>+/+</sup> and *Usp13*<sup>m/m</sup> MEFs infected for 8h with HSV-1.

(c) Immunoprecipitation (with GST beads and TUBE) and immunoblot analysis (with anti-STING, anti-Ub, anti-USP13, anti- $\beta$ -Actin) of *Usp13*<sup>+/+</sup> or *Usp13*<sup>m/m</sup> BMDCs infected with HSV-1 for 0-8 hours.

(d-e) Denature-immunoprecipitation (with anti-STING) and immunoblot analysis (with anti-Ub, anti-STING, anti-USP13 or anti- $\beta$ -Actin) of *Usp13*<sup>+/+</sup> and *Usp13*<sup>m/m</sup> MEFs (d) or USP13-knockdown-THP-1 cells (e) infected for 8h with SeV.

Data are representative of three independent experiments.



**a**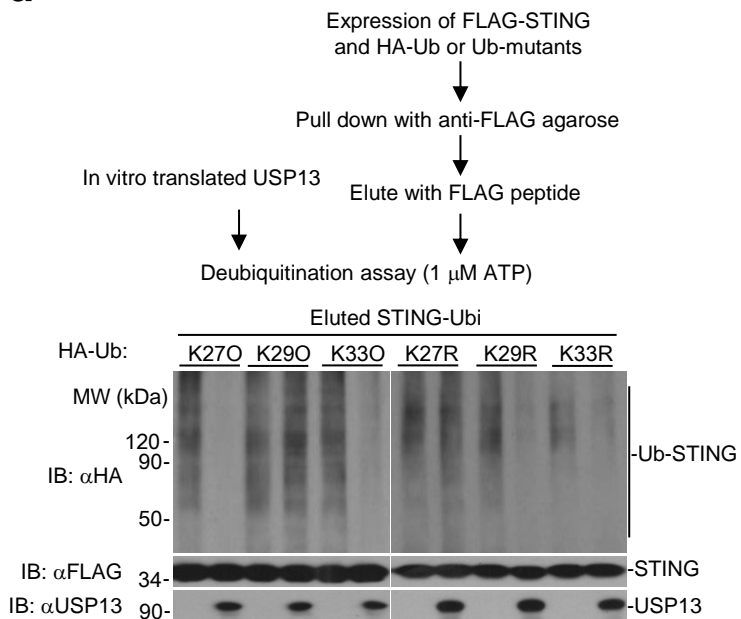**b**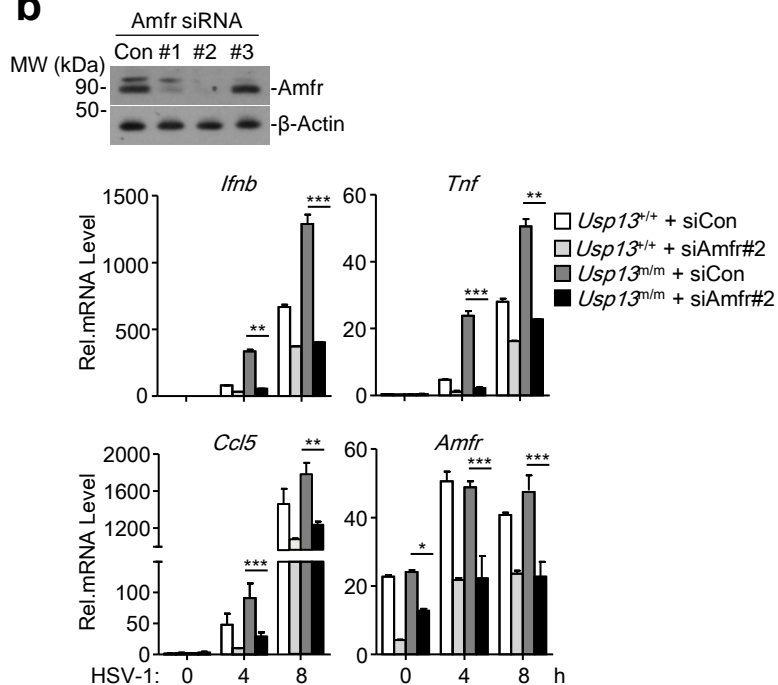**c**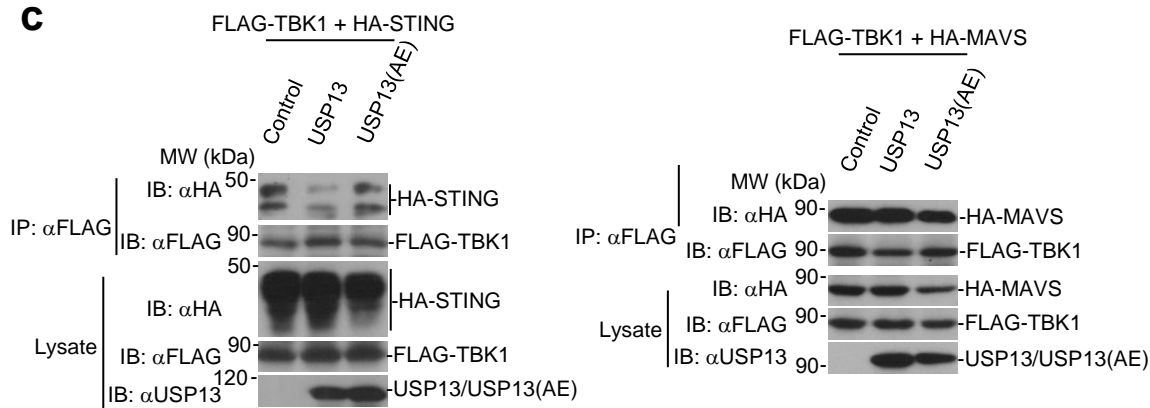

**Supplementary Figure 9 USP13 deconjugates K37/K33-linked polyubiquitin chains from STING.**

(a) In vitro deubiquitination of Ubiquitin-modified STING by USP13.

(b) Immunoblot (upper panels) and qRT-PCR (lower graphs) analysis of *Usp13*<sup>+/+</sup> and *Usp13*<sup>n/m</sup> MEFs that were transfected with control siRNA or siRNA targeting Amfr for 36 hours and then left untreated or infected with HSV-1 for 4-8 hours.

(c) Immunoprecipitation (with anti-FLAG) and immunoblot analysis (with anti-FLAG, anti-HA or anti-USP13) of HEK293 cells transfected with plasmids encoding FLAG-TBK1, HA-STING, HA-MAVS and the empty vector (Control), USP13 or USP13(AE) for 20 hours.

\* $P < 0.05$ ; \*\* $P < 0.01$ ; \*\*\* $P < 0.001$  (analysis of two-way ANOVA followed by Bonferroni post-test). Data are representative of three independent experiments (mean  $\pm$  S.D. in c).

Steady state

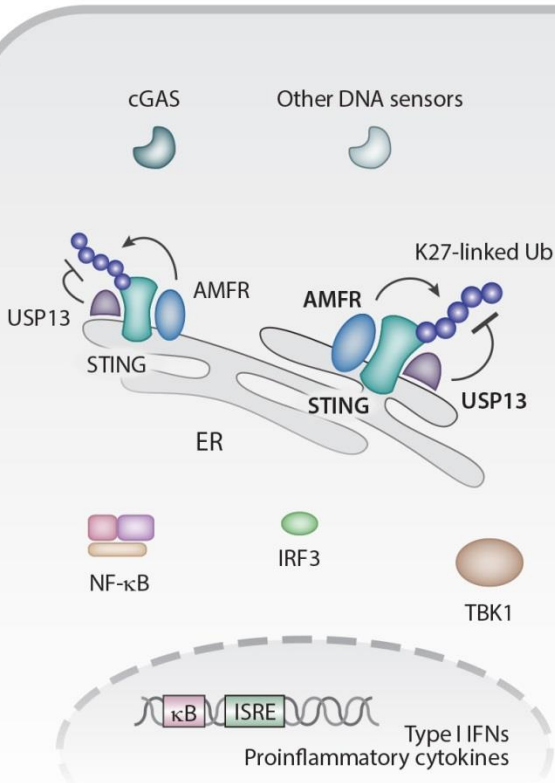

Virus infection

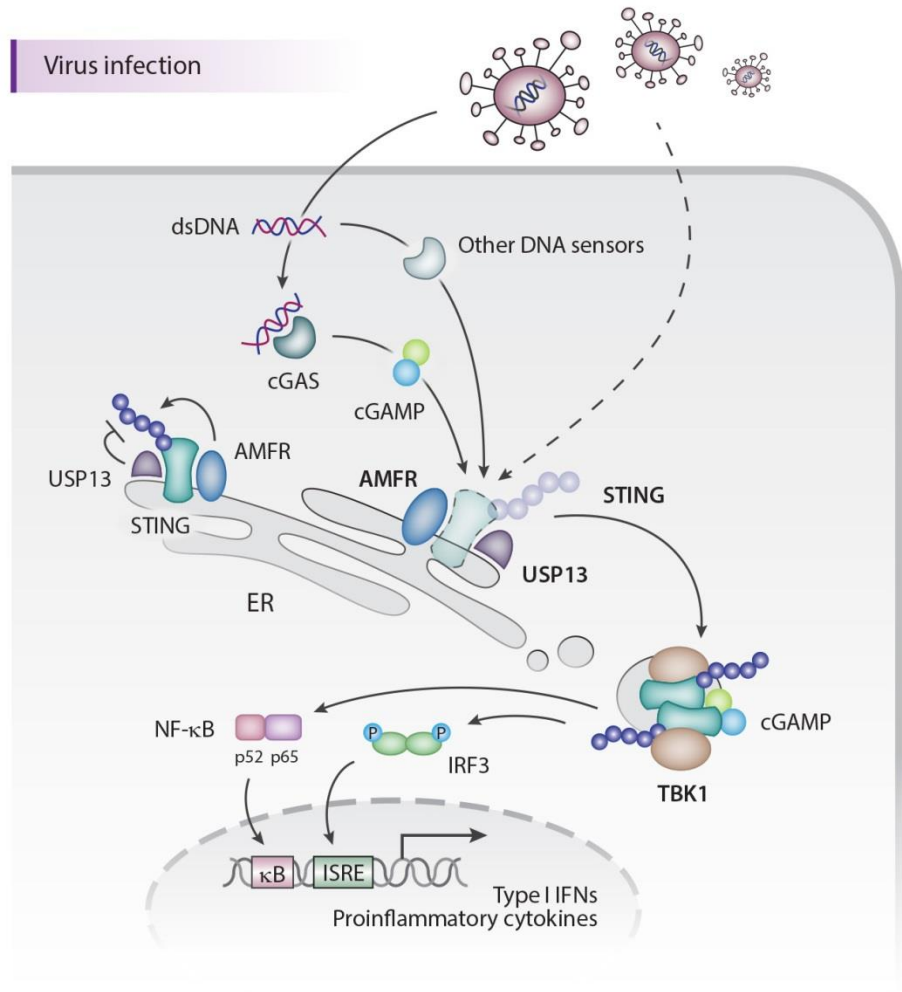

**Supplementary Figure 10 A model on USP13-mediated regulation of antiviral responses.**

In unstimulated cells, USP13 interacts with and catalyzes deubiquitination of STING which constitutively undergoes K27-linked ubiquitination mediated by AMFR/gp78, thereby restricting the basal immune signaling. Upon infection with DNA viruses, the majority of USP13-interacting STING is disassociated from USP13 and translocates to form puncta, thereby leading to increased ubiquitination of STING and boosted recruitment of TBK1. Meanwhile, a portion of USP13 still interacts with STING to prevent excessive immune and inflammatory responses.

# Supplementary Figure 11 Original immunoblots for Figure 1

## Figure 1

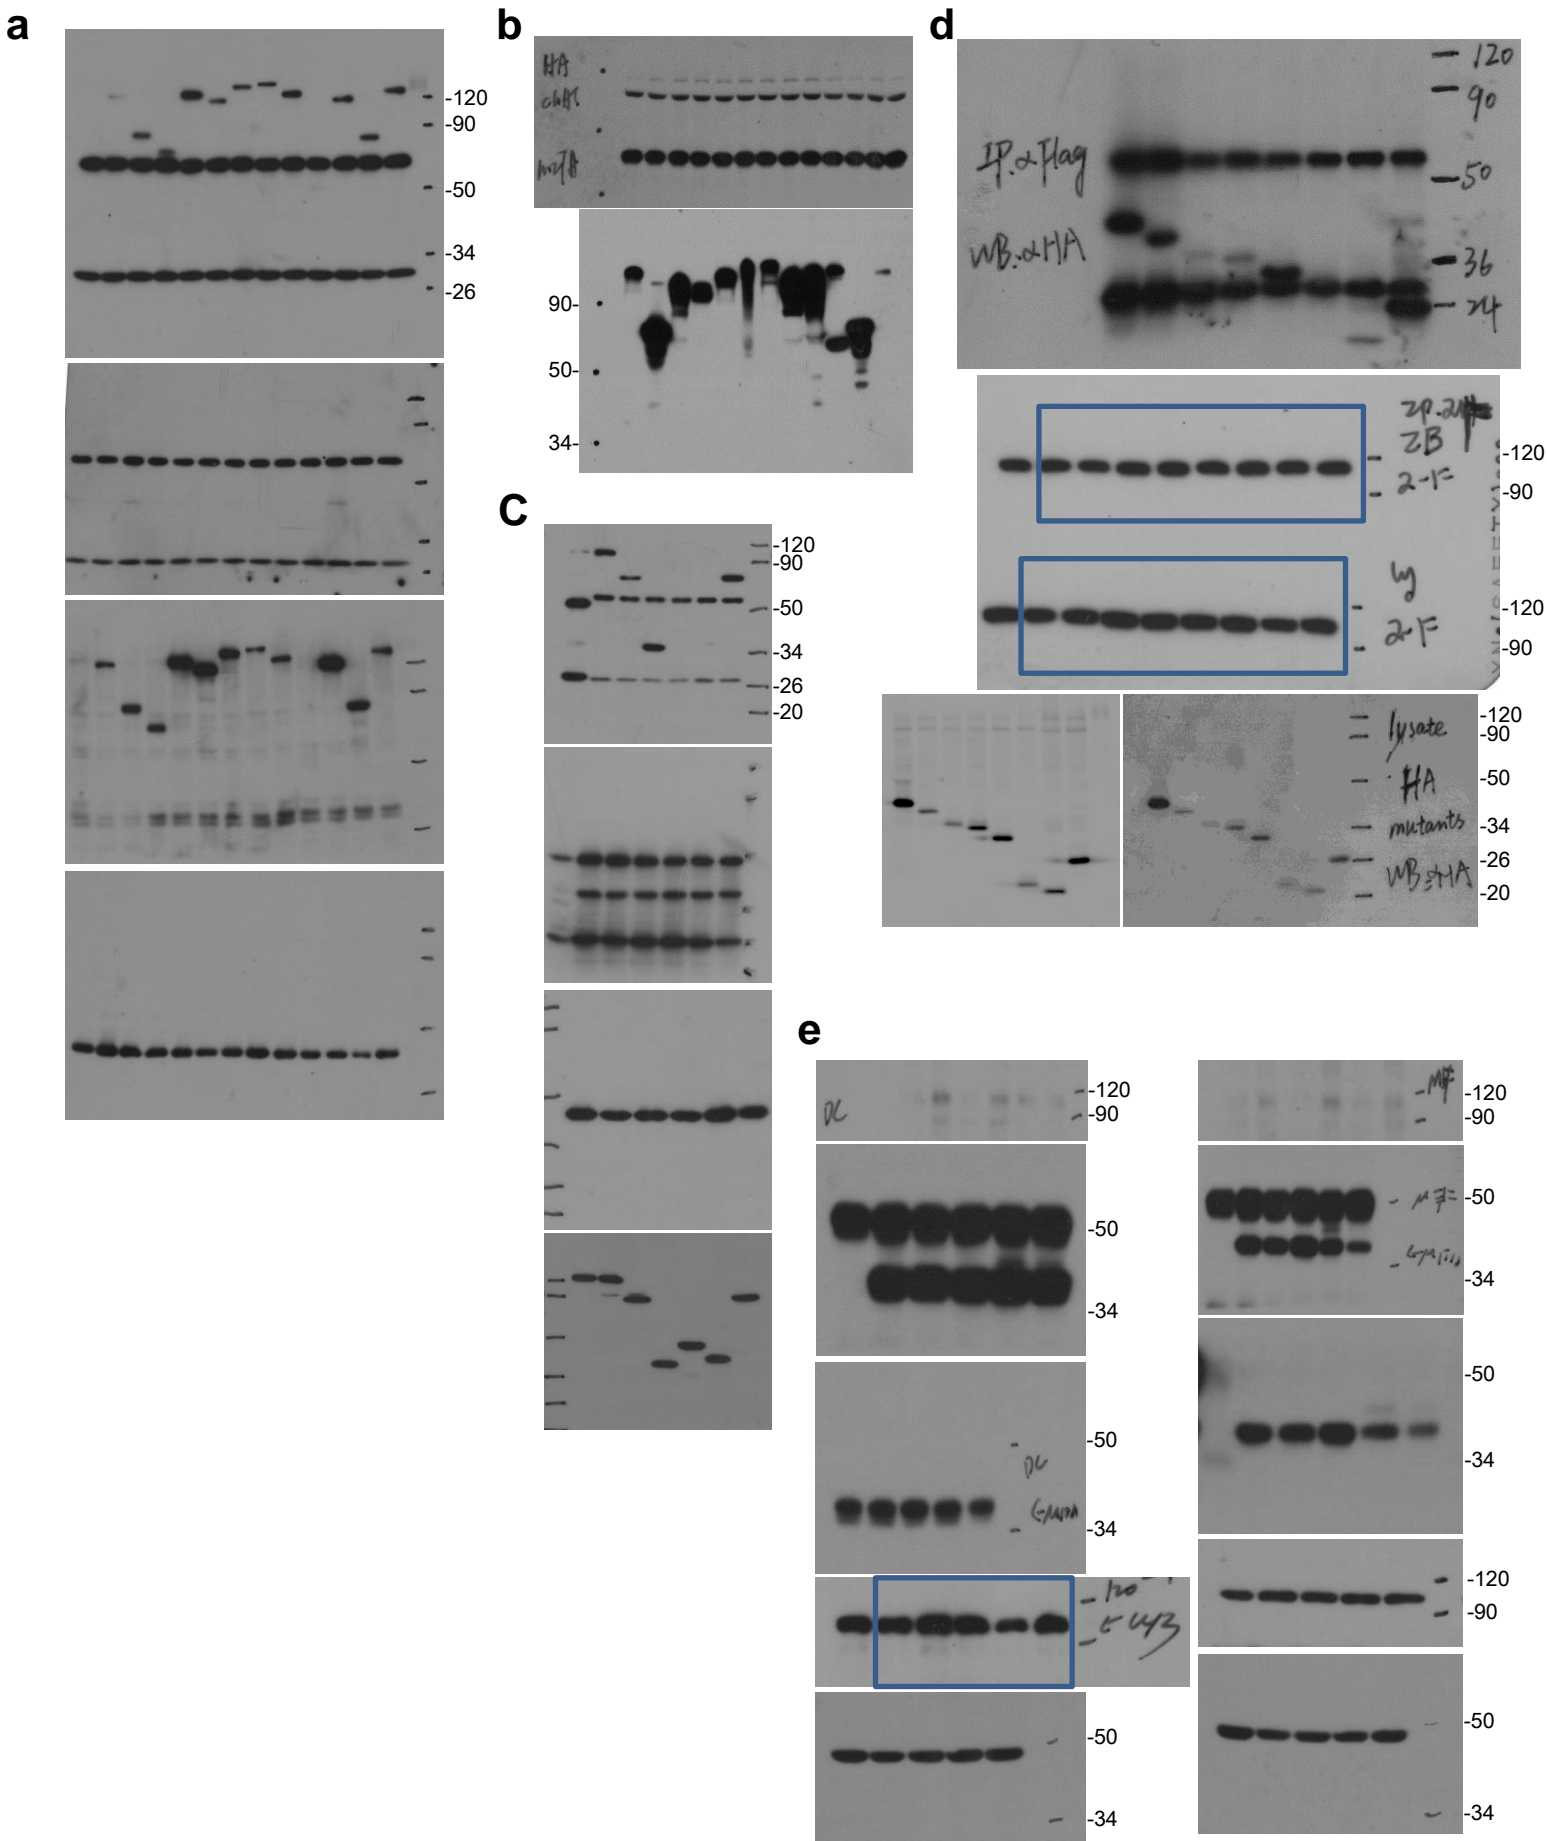

# Supplementary Figure 12 Original immunoblots for Figures 2, 3, and 5

## Figure 2

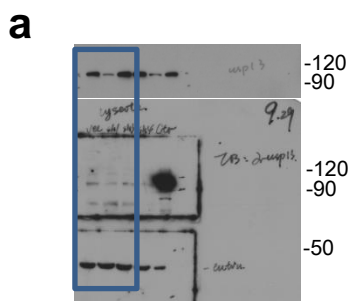

## Figure 3

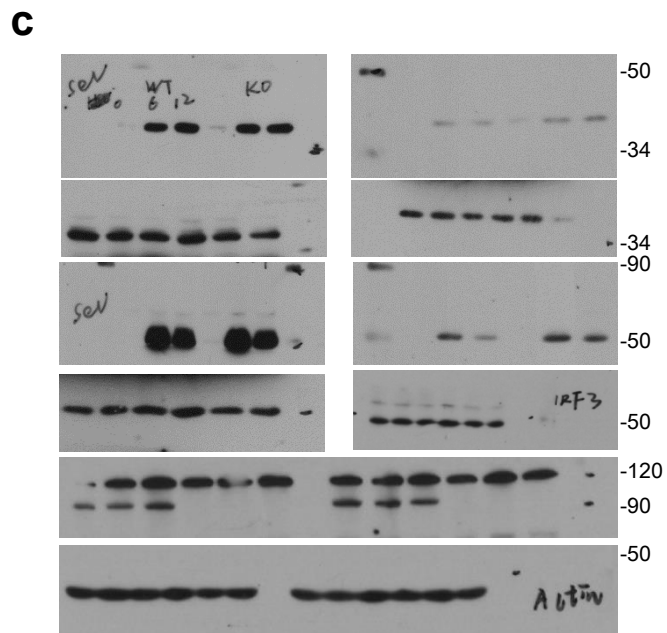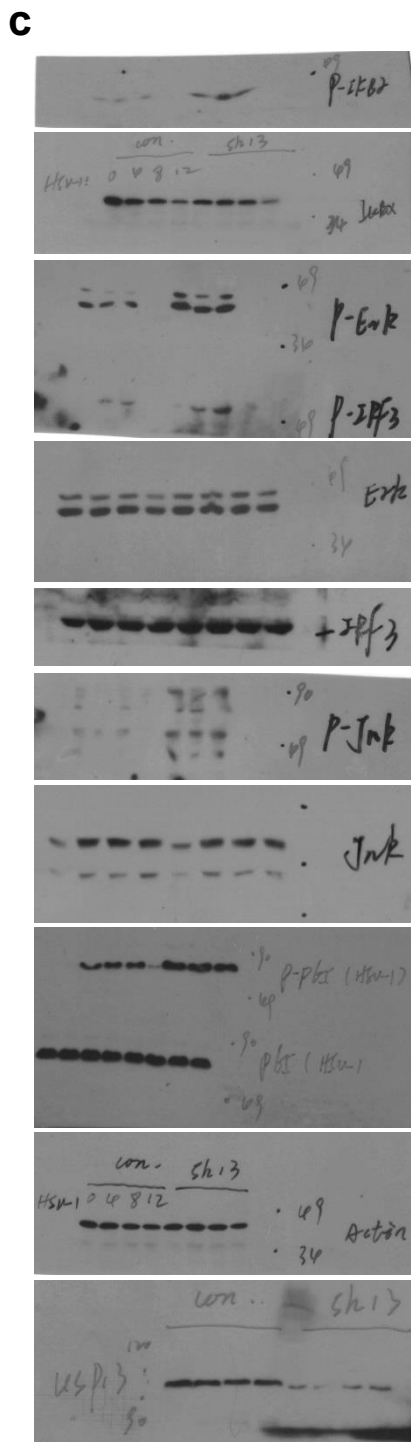

## Figure 5

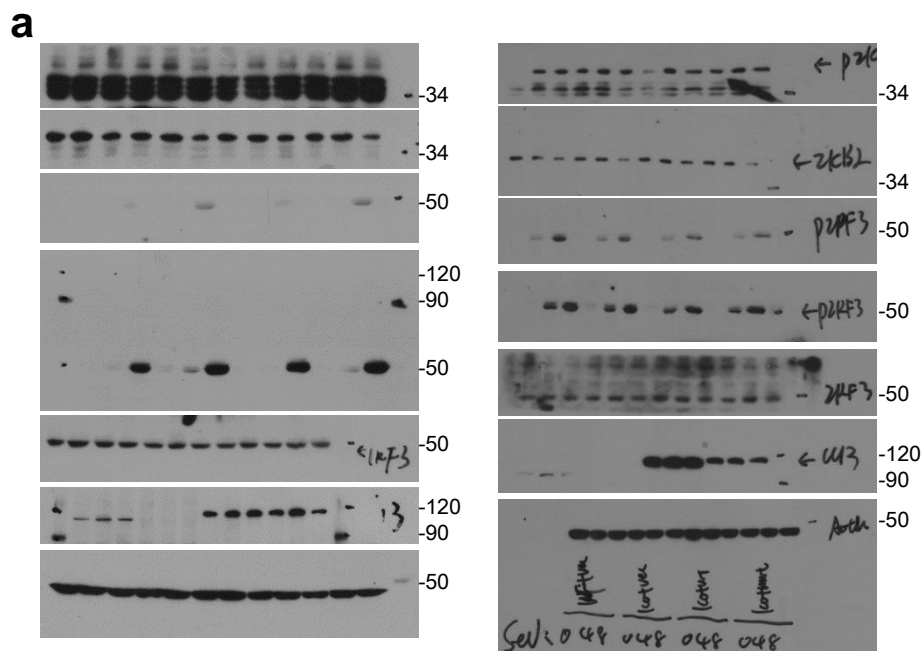

# Supplementary Figure 13 Original immunoblots for Figures 6 and 7

## Figure 6

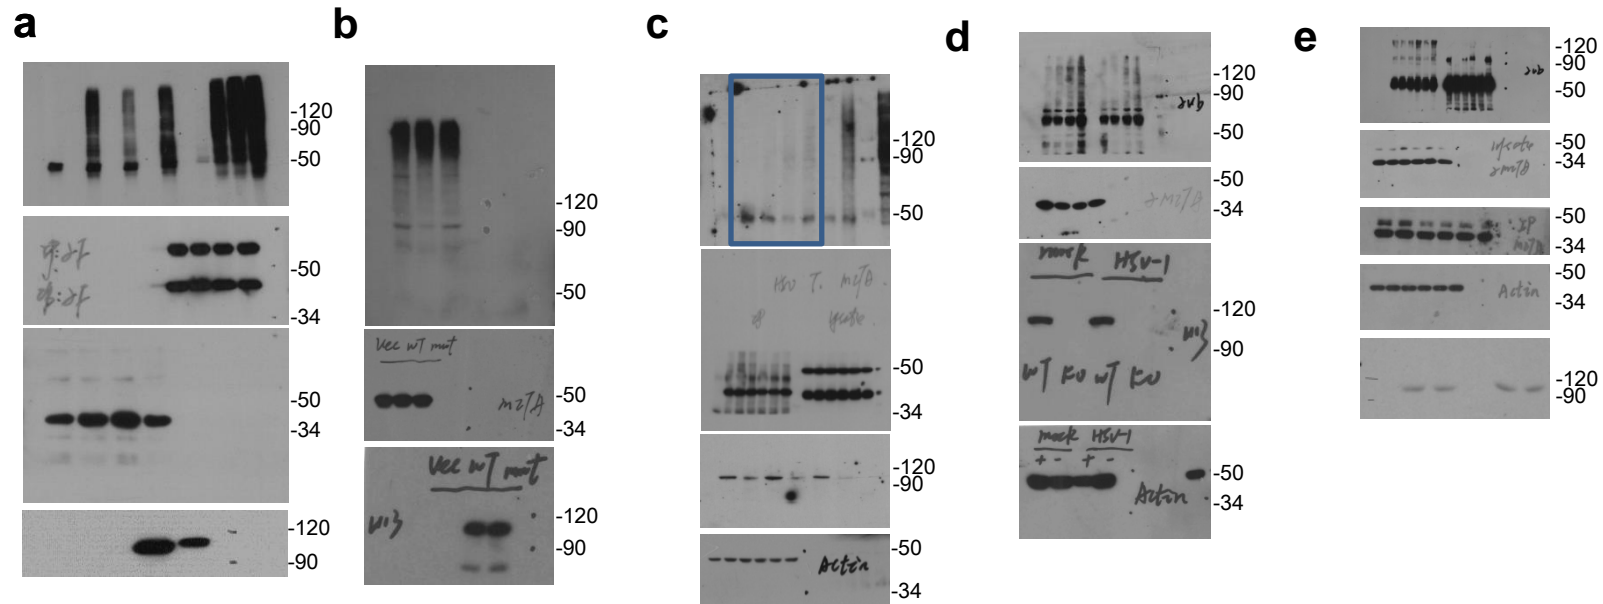

## Figure 7

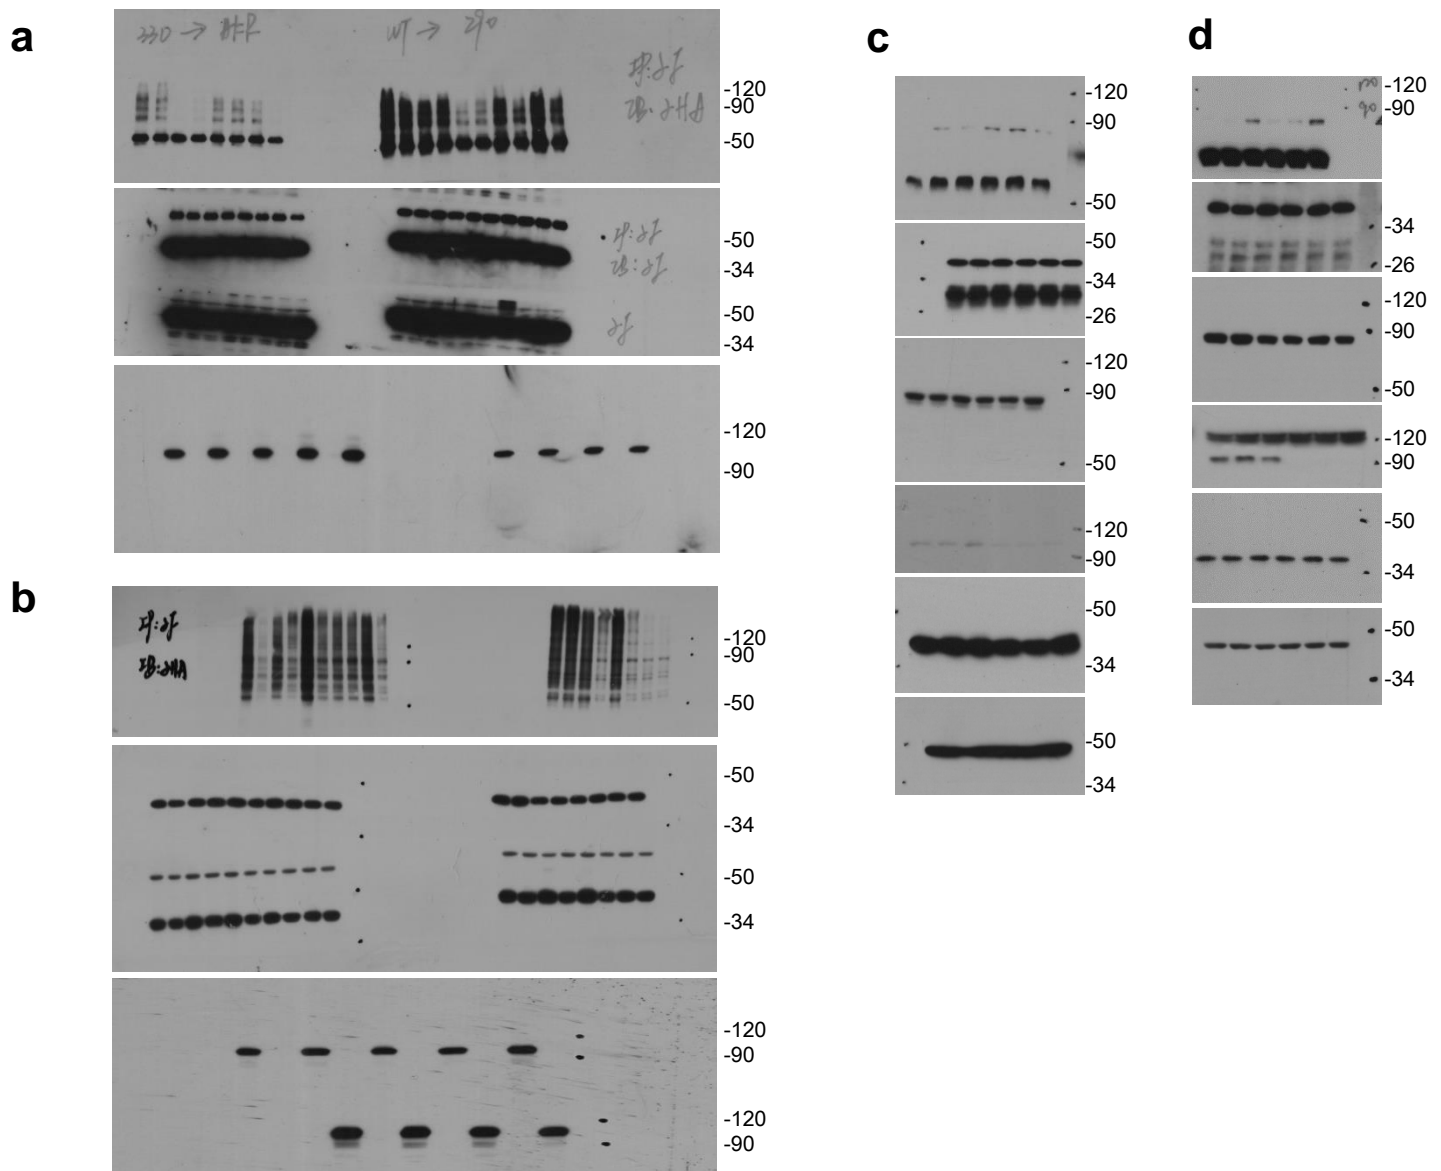

Supplement: ncomms15534-s1.pdf [file ncomms15534-s1.pdf]
